# Supplementary material for: Lactoferrin Levels in Cerebrospinal Fluid Exhibit Differential Associations with Alzheimer’s Disease
Source: Research Square preprint supplement (doi:10.21203/rs.3.rs-9678397/v1), 2026-07-07
Supplement: Supplementary file 1 [file 4b0b6a2315ac40eadd4b8cc1.xlsx]

## Sheet:  Supplementary Table S1
	AptName	SeqId	Target	UniProt	EntrezGene	Dilution	Plasma (Mean)	CSF (Mean)	Plasma (SD)	CSF (SD)	Plasma (Range)	CSF (Range)
LTF1	Seq.14755.4	14755-4	Lactoferrin	P02788	4057	0.2	370	132	469	79	[193.4, 14246.5]	[98.2, 2525.2]
LTF2	Seq.2780.35	2780-35	Lactoferrin	P02788	4057	5e-05	1260	19951	4703	20804	[288.4,169268.3]	[326.3, 161054.1]

## Sheet:  Supplementary Table S2
	Control (113)	MCI (833)	Dementia (394)	NA (29)	Total (1,369)
Age_LP	66.593 (7.039)	72.487 (7.992)	74.851 (7.497)	50.263 (13.32)	72.21 (8.807)
csf_abeta_42	1068.717 (377.948)	844.449 (415.512)	689.87(319.293)	1045.034 (384.142)	822.819 (400.566)
csf_p_tau	45.292 (19.054)	69.192 (40.396)	85.45 (54.522)	35.69 (16.557)	71.178 (44.99)
csf_tau	277.912 (120.454)	439.148 (276.461)	574.293 (402.932)	250.759 (117.47)	460.66 (319.743)
mmse_csf	29.396 (1.04)	25.759 (3.191)	20.614 (4.567)	NaN (NA)	24.525 (4.465)
qalb	0.006 (0.002)	0.006 (0.002)	0.007 (0.005)	0.005 (0.001)	0.006 (0.003)
apoe_e2e2	0	2	1	1	4
apoe_e2e3	21	49	24	0	94
apoe_e2e4	3	14	7	0	24
apoe_e3e3	64	480	213	22	779
apoe_e3e4	20	227	123	6	376
apoe_e4e4	3	41	20	0	64
atn_A-T-N-	79	251	69	19	418
atn_A-T-N+	0	11	3	2	16
atn_A-T+N-	3	33	6	0	42
atn_A-T+N+	7	115	45	1	168
atn_A+T-N-	13	119	64	6	202
atn_A+T-N+	0	5	5	0	10
atn_A+T+N-	2	59	10	0	71
atn_A+T+N+	9	240	191	1	441
mci_dementia_conversion_1y_0n_0	0	386	0	0	386
mci_dementia_conversion_1y_0n_1	0	367	0	0	367
Gender_Male	46	378	140	13	577
Gender_Female	67	455	254	16	792

## Sheet:  Supplementary Table S3
term	statistic	Model1	Model2	Model3	Model4	Model5	Model6	Model7	Model8	Model9	Model10	Model11	Model12	Model13	Model14
(Intercept)	estimate	0.001	0.001	0.045	0.004	0.006	-0.011	0.175	-0.004	-0.005	-0.213	0.001	0.013	-0.018	-0.057
(Intercept)	std.error	-0.027	-0.026	-0.091	-0.025	-0.027	-0.027	-0.083	-0.027	-0.026	-0.09	-0.022	-0.021	-0.026	-0.068
(Intercept)	p.value	p = 0.984	p = 0.961	p = 0.617	p = 0.89	p = 0.81	p = 0.676	p = 0.034	p = 0.892	p = 0.86	p = 0.018	p = 0.955	p = 0.524	p = 0.484	p = 0.403
LTF1	estimate	0.082	0.098	0.081	-0.014	-0.005	0.149	0	0.086	0.068	0.09	-0.073	-0.167	0.169	-0.071
LTF1	std.error	-0.034	-0.033	-0.034	-0.033	-0.035	-0.035	-0.033	-0.034	-0.033	-0.034	-0.028	-0.028	-0.034	-0.027
LTF1	p.value	p = 0.017	p = 0.003	p = 0.018	p = 0.669	p = 0.893	p = <0.001	p = 0.998	p = 0.011	p = 0.037	p = 0.008	p = 0.009	p = <0.001	p = <0.001	p = 0.01
poly(Age_LP, 2)1	estimate		-8.869					-9.04		10.299					6.75
poly(Age_LP, 2)1	std.error		-0.968					-0.96		-0.95					-0.79
poly(Age_LP, 2)1	p.value		p = <0.001					p = <0.001		p = <0.001					p = <0.001
poly(Age_LP, 2)2	estimate		1.771					1.616		-2.634					-1.501
poly(Age_LP, 2)2	std.error		-0.967					-0.886		-0.949					-0.729
poly(Age_LP, 2)2	p.value		p = 0.067					p = 0.069		p = 0.006					p = 0.04
sex_1M_2F	estimate			-0.028				-0.108			0.133				0.034
sex_1M_2F	std.error			-0.055				-0.051			-0.055				-0.042
sex_1M_2F	p.value			p = 0.605				p = 0.032			p = 0.015				p = 0.409
seq.18268.5_GAGE2A	estimate				0.381			0.715				0.631			0.01
seq.18268.5_GAGE2A	std.error				-0.027			-0.069				-0.023			-0.057
seq.18268.5_GAGE2A	p.value				p= <0.001			p= <0.001				p = <0.001			p = 0.861
PC1	estimate					-0.008		0.01					-0.022		-0.019
PC1	std.error					-0.001		-0.002					-0.001		-0.002
PC1	p.value					p = <0.001		p = <0.001					p = <0.001		p = <0.001
PC2	estimate						-0.019	0.009						-0.024	-0.022
PC2	std.error						-0.002	-0.003						-0.002	-0.003
PC2	p.value						p = <0.001	p = 0.004						p = <0.001	p = <0.001
R2		0.004	0.065	0.004	0.134	0.05	0.048	0.229	0.005	0.09	0.009	0.365	0.395	0.074	0.472
R2 Adj.		0.004	0.063	0.003	0.133	0.048	0.047	0.225	0.004	0.088	0.008	0.364	0.394	0.073	0.469
RMSE		1	0.97	1	0.93	0.97	0.97	0.88	0.99	0.95	0.99	0.79	0.77	0.95	0.72
Num.Obs.		1348	1348	1348	1348	1348	1348	1348	1348	1348	1348	1348	1348	1348	1348

## Sheet:  Supplementary Table S4
term	statistic	Model1	Model2	Model3	Model4	Model5	Model6	Model7	Model8	Model9	Model10	Model11	Model12	Model13	Model14
(Intercept)	estimate	0.239	0.258	0.945	0.157	0.04	0.328	0.849	0.318	0.298	0.093	0.118	-0.251	0.515	-0.027
(Intercept)	std.error	-0.175	-0.173	-0.379	-0.173	-0.206	-0.205	-0.454	-0.177	-0.172	-0.395	-0.136	-0.17	-0.203	-0.37
(Intercept)	p.value	0.175	0.141	0.015	0.367	0.846	0.115	0.066	0.077	0.087	0.815	0.39	0.145	0.014	0.941
LTF1	estimate	-0.004	-0.012	-0.02	-0.004	0.018	0	-0.037	-0.143	-0.134	-0.138	-0.144	-0.082	-0.134	-0.119
LTF1	std.error	-0.062	-0.061	-0.061	-0.06	-0.062	-0.062	-0.067	-0.063	-0.061	-0.063	-0.047	-0.052	-0.062	-0.055
LTF1	p.value	0.952	0.843	0.747	0.943	0.777	0.996	0.583	0.026	0.031	0.033	0.003	0.117	0.034	0.034
poly(Age_LP, 2)1	estimate		-1.258					-1.444		2.164					1.1
poly(Age_LP, 2)1	std.error		-0.893					-0.916		-0.886					-0.747
poly(Age_LP, 2)1	p.value		0.163					0.12		0.017					0.146
poly(Age_LP, 2)2	estimate		1.056					0.906		-0.368					-0.746
poly(Age_LP, 2)2	std.error		-0.893					-0.861		-0.886					-0.702
poly(Age_LP, 2)2	p.value		0.242					0.297		0.679					0.292
sex_1M_2F	estimate			-0.445				-0.405			0.142				0.078
sex_1M_2F	std.error			-0.213				-0.219			-0.222				-0.178
sex_1M_2F	p.value			0.041				0.069			0.526				0.661
seq.18268.5_GAGE2A	estimate				0.274			0.39				0.667			0.513
seq.18268.5_GAGE2A	std.error				-0.117			-0.297				-0.092			-0.242
seq.18268.5_GAGE2A	p.value				0.023			0.194				<0.001			0.038
PC1	estimate					-0.007		0.003					-0.019		-0.004
PC1	std.error					-0.004		-0.009					-0.003		-0.007
PC1	p.value					0.082		0.758					<0.001		0.596
PC2	estimate						-0.009	0.002						-0.02	-0.006
PC2	std.error						-0.011	-0.014						-0.011	-0.011
PC2	p.value						0.41	0.907						0.067	0.576
Num.Obs.		69	69	69	69	69	69	69	69	69	69	69	69	69	69
R2		0	0.049	0.062	0.076	0.045	0.01	0.195	0.072	0.152	0.078	0.481	0.406	0.118	0.516
R2 Adj.		-0.015	0.006	0.034	0.048	0.016	-0.02	0.103	0.058	0.113	0.05	0.465	0.388	0.092	0.461
RMSE		0.89	0.87	0.86	0.85	0.87	0.88	0.8	0.9	0.86	0.9	0.67	0.72	0.88	0.65

## Sheet:  Supplementary Table S5
																																This table show the results of the linear regression between csf amylokd beta42, ptau and LTF1 in CSF using sex, age, reference gene, PC1, PC2 as covariants in LTF1 high express population																This table show the results of the linear regression between csf amylokd beta42, ptau and LTF1 in CSF using sex, age, reference gene, PC1, PC2 as covariants in LTF1 high express population
term	statistic	Model1	Model2	Model3	Model4	Model5	Model6	Model7	Model8	Model9	Model10	Model11	Model12	Model13	Model14
(Intercept)	estimate	0.004	0.015	0.015	-0.021	-0.008	-0.011	0.144	0.057	0.045	-0.144	0.017	0.022	0.037	-0.052
(Intercept)	std.error	-0.03	-0.029	-0.094	-0.028	-0.029	-0.029	-0.086	-0.029	-0.028	-0.092	-0.024	-0.023	-0.028	-0.071
(Intercept)	p.value	p = 0.883	p = 0.602	p = 0.875	p = 0.442	p = 0.789	p = 0.695	p = 0.095	p = 0.053	p = 0.107	p = 0.118	p = 0.486	p = 0.341	p = 0.187	p = 0.466
LTF1	estimate	0.12	0.183	0.12	-0.119	-0.074	0.195	-0.032	0.383	0.316	0.385	0.01	-0.167	0.475	-0.06
LTF1	std.error	-0.061	-0.06	-0.061	-0.06	-0.065	-0.061	-0.06	-0.06	-0.058	-0.06	-0.051	-0.051	-0.058	-0.049
LTF1	p.value	p = 0.050	p = 0.002	p = 0.051	p = 0.046	p = 0.258	p = 0.001	p = 0.598	p = <0.001	p = <0.001	p = <0.001	p = 0.837	p = 0.001	p = <0.001	p = 0.226
poly(Age_LP, 2)1	estimate		-8.978					-8.676		9.564					6.568
poly(Age_LP, 2)1	std.error		-0.976					-0.971		-0.948					-0.799
poly(Age_LP, 2)1	p.value		p = <0.001					p = <0.001		p = <0.001					p = <0.001
poly(Age_LP, 2)2	estimate		1.605					1.501		-2.592					-1.352
poly(Age_LP, 2)2	std.error		-0.97					-0.89		-0.942					-0.733
poly(Age_LP, 2)2	p.value		p = 0.098					p = 0.092		p = 0.006					p = 0.065
sex_1M_2F	estimate			-0.007				-0.097			0.128				0.033
sex_1M_2F	std.error			-0.057				-0.052			-0.055				-0.043
sex_1M_2F	p.value			p = 0.907				p = 0.064			p = 0.022				p = 0.437
seq.18268.5_GAGE2A	estimate				0.397			0.741				0.618			-0.019
seq.18268.5_GAGE2A	std.error				-0.028			-0.072				-0.024			-0.059
seq.18268.5_GAGE2A	p.value				p = <0.001			p = <0.001				p = <0.001			p = 0.752
PC1	estimate					-0.008		0.011					-0.023		-0.02
PC1	std.error					-0.001		-0.002					-0.001		-0.002
PC1	p.value					p = <0.001		p = <0.001					p = <0.001		p = <0.001
PC2	estimate						-0.02	0.009						-0.025	-0.023
PC2	std.error						-0.002	-0.003						-0.002	-0.003
PC2	p.value						p = <0.001	p = 0.005						p = <0.001	p = <0.001
Num.Obs.		1279	1279	1279	1279	1279	1279	1279	1279	1279	1279	1279	1279	1279	1279
R2		0.003	0.067	0.003	0.138	0.048	0.052	0.231	0.031	0.107	0.035	0.362	0.398	0.107	0.472
R2 Adj.		0.002	0.065	0.001	0.137	0.046	0.051	0.227	0.03	0.105	0.033	0.361	0.397	0.106	0.469
RMSE		1	0.97	1	0.93	0.98	0.98	0.88	0.98	0.94	0.98	0.8	0.77	0.94	0.72

## Sheet:  Supplementary Table S6
term	statistic	Model1	Model2	Model3	Model4	Model5	Model6	Model7	Model8	Model9	Model10	Model11	Model12	Model13	Model14
Intercept	estimate	-0.003	-0.003	0.041	0.004	0.007	-0.016	0.167	-0.008	-0.008	-0.208	0.005	0.02	-0.024	-0.047
Intercept	std.error	-0.027	-0.026	-0.09	-0.025	-0.026	-0.027	-0.083	-0.027	-0.026	-0.09	-0.022	-0.021	-0.026	-0.068
Intercept	p.value	p = 0.898	p = 0.895	p = 0.651	p = 0.874	p = 0.802	p = 0.551	p = 0.044	p = 0.771	p = 0.761	p = 0.022	p = 0.832	p = 0.356	p = 0.356	p = 0.494
LTF1	estimate	-0.112	-0.097	-0.111	-0.087	-0.113	-0.098	-0.054	0.001	-0.017	-0.001	0.043	-0.003	0.019	0.005
LTF1	std.error	-0.027	-0.026	-0.027	-0.025	-0.026	-0.027	-0.024	-0.027	-0.026	-0.027	-0.022	-0.021	-0.026	-0.02
LTF1	p.value	p = <0.001	p = <0.001	p = <0.001	p = <0.001	p = <0.001	p = <0.001	p = 0.025	p = 0.967	p = 0.520	p = 0.985	p = 0.050	p = 0.879	p = 0.477	p = 0.800
polyAge_LP, 21	estimate		-8.527					-9.003		10.43					6.94
polyAge_LP, 21	std.error		-0.967					-0.954		-0.951					-0.789
polyAge_LP, 21	p.value		p = <0.001					p = <0.001		p = <0.001					p = <0.001
polyAge_LP, 22	estimate		1.665					1.581		-2.668					-1.431
polyAge_LP, 22	std.error		-0.965					-0.884		-0.95					-0.731
polyAge_LP, 22	p.value		p = 0.085					p = 0.074		p = 0.005					p = 0.050
sex_1M_2F	estimate			-0.028				-0.103			0.127				0.029
sex_1M_2F	std.error			-0.055				-0.05			-0.055				-0.042
sex_1M_2F	p.value			p = 0.607				p = 0.042			p = 0.021				p = 0.491
seq.18268.5_GAGE2A	estimate				0.373			0.695				0.621			-0.001
seq.18268.5_GAGE2A	std.error				-0.026			-0.07				-0.022			-0.058
seq.18268.5_GAGE2A	p.value				p = <0.001			p = <0.001				p = <0.001			p = 0.992
PC1	estimate					-0.008		0.01					-0.021		-0.019
PC1	std.error					-0.001		-0.002					-0.001		-0.002
PC1	p.value					p = <0.001		p = <0.001					p = <0.001		p = <0.001
PC2	estimate						-0.016	0.009						-0.021	-0.024
PC2	std.error						-0.002	-0.003						-0.002	-0.003
PC2	p.value						p = <0.001	p = 0.004						p = <0.001	p = <0.001
Num.Obs.		1348	1348	1348	1348	1348	1348	1348	1348	1348	1348	1348	1348	1348	1348
R2		0.012	0.068	0.013	0.142	0.062	0.045	0.231	0	0.087	0.004	0.364	0.379	0.058	0.469
R2 Adj.		0.012	0.066	0.011	0.14	0.061	0.043	0.227	-0.001	0.085	0.003	0.363	0.378	0.056	0.466
RMSE		0.99	0.96	0.99	0.92	0.97	0.98	0.88	0.99	0.95	0.99	0.79	0.78	0.96	0.72

## Sheet:  Supplementary Table S7
fluid	cohort	x	y	rho	p	n
CSF	ContJ_CSF	LTF1_z	LTF2_z			117
CSF	ContJ_CSF	LTF1_z	Comp.1			117
CSF	ContJ_CSF	LTF1_z	Comp.2			117
CSF	ContJ_CSF	LTF2_z	Comp.1	-0.0944417	0.310661	117
CSF	ContJ_CSF	LTF2_z	Comp.2	0.0366108	0.694741	117
CSF	ContJ_CSF	LTF1_z	age_at_visit			116
CSF	ContJ_CSF	LTF2_z	age_at_visit	0.0388562	0.678787	116
CSF	ContJ_CSF	LTF1_z	cdr			117
CSF	ContJ_CSF	LTF2_z	cdr	0.226846	0.013912	117
CSF	ContN_CSF	LTF1_z	LTF2_z	-0.139129	0.0147007	307
CSF	ContN_CSF	LTF1_z	Comp.1	-0.0725249	0.205075	307
CSF	ContN_CSF	LTF1_z	Comp.2	0.0139496	0.807671	307
CSF	ContN_CSF	LTF2_z	Comp.1	0.024396	0.670105	307
CSF	ContN_CSF	LTF2_z	Comp.2	0.0721975	0.207009	307
CSF	ContN_CSF	LTF1_z	age_at_visit	-0.0275219	0.630981	307
CSF	ContN_CSF	LTF2_z	age_at_visit	0.117572	0.0395157	307
CSF	ContN_CSF	LTF1_z	cdr	-0.0678053	0.23619	307
CSF	ContN_CSF	LTF2_z	cdr	0.0803736	0.160084	307
CSF	ContO_CSF	LTF1_z	LTF2_z	0.0553169	0.0600837	1156
CSF	ContO_CSF	LTF1_z	Comp.1	0.370858	5.27016e-39	1156
CSF	ContO_CSF	LTF1_z	Comp.2	0.580893	2.84462e-105	1156
CSF	ContO_CSF	LTF2_z	Comp.1	0.0055809	0.849642	1156
CSF	ContO_CSF	LTF2_z	Comp.2	0.0417402	0.156097	1156
CSF	ContO_CSF	LTF1_z	age_at_visit	0.216404	1.02165e-13	1156
CSF	ContO_CSF	LTF2_z	age_at_visit	0.069941	0.017391	1156
CSF	ContO_CSF	LTF1_z	cdr			0
CSF	ContO_CSF	LTF2_z	cdr			0
CSF	ContQ_CSF	LTF1_z	LTF2_z	-0.0685412	0.0111609	1370
CSF	ContQ_CSF	LTF1_z	Comp.1	0.137536	3.21543e-07	1370
CSF	ContQ_CSF	LTF1_z	Comp.2	0.0856394	0.00151002	1370
CSF	ContQ_CSF	LTF2_z	Comp.1	-0.0827634	0.00217069	1370
CSF	ContQ_CSF	LTF2_z	Comp.2	-0.0314771	0.244302	1370
CSF	ContQ_CSF	LTF1_z	age_at_visit	0.0583095	0.0309811	1369
CSF	ContQ_CSF	LTF2_z	age_at_visit	0.0390616	0.148596	1369
CSF	ContQ_CSF	LTF1_z	cdr	-0.00436085	0.874324	1318
CSF	ContQ_CSF	LTF2_z	cdr	0.0433952	0.115331	1318
CSF	ContT_CSF	LTF1_z	LTF2_z	-0.0488352	0.455255	236
CSF	ContT_CSF	LTF1_z	Comp.1	0.0842877	0.196955	236
CSF	ContT_CSF	LTF1_z	Comp.2	-0.0183446	0.779215	236
CSF	ContT_CSF	LTF2_z	Comp.1	0.0233399	0.721125	236
CSF	ContT_CSF	LTF2_z	Comp.2	-0.107059	0.100844	236
CSF	ContT_CSF	LTF1_z	age_at_visit	0.0796666	0.224722	234
CSF	ContT_CSF	LTF2_z	age_at_visit	0.0306072	0.641357	234
CSF	ContT_CSF	LTF1_z	cdr	0.121703	0.273065	83
CSF	ContT_CSF	LTF2_z	cdr	-0.351775	0.00110974	83

## Sheet:  Supplementary Table S8
fluid	cohort	x	y	rho	p	n
EDTA_Plasma	ContA_EDTAPlasma	LTF1_z	LTF2_z	0.151794	1.74554e-06	983
EDTA_Plasma	ContA_EDTAPlasma	LTF1_z	Comp.1	-0.299591	7.80427e-22	983
EDTA_Plasma	ContA_EDTAPlasma	LTF1_z	Comp.2	-0.160188	4.45051e-07	983
EDTA_Plasma	ContA_EDTAPlasma	LTF2_z	Comp.1	-0.0663052	0.0376634	983
EDTA_Plasma	ContA_EDTAPlasma	LTF2_z	Comp.2	-0.132937	2.89932e-05	983
EDTA_Plasma	ContA_EDTAPlasma	LTF1_z	age_at_visit	0.0611505	0.0560402	977
EDTA_Plasma	ContA_EDTAPlasma	LTF2_z	age_at_visit	-0.0019058	0.952559	977
EDTA_Plasma	ContA_EDTAPlasma	LTF1_z	cdr			0
EDTA_Plasma	ContA_EDTAPlasma	LTF2_z	cdr			0
EDTA_Plasma	ContB_EDTAPlasma	LTF1_z	LTF2_z	0.000319644	0.994647	443
EDTA_Plasma	ContB_EDTAPlasma	LTF1_z	Comp.1	-0.114675	0.0157448	443
EDTA_Plasma	ContB_EDTAPlasma	LTF1_z	Comp.2	-0.184663	9.25252e-05	443
EDTA_Plasma	ContB_EDTAPlasma	LTF2_z	Comp.1	0.0562191	0.237656	443
EDTA_Plasma	ContB_EDTAPlasma	LTF2_z	Comp.2	-0.0599546	0.207862	443
EDTA_Plasma	ContB_EDTAPlasma	LTF1_z	age_at_visit	0.0393358	0.408859	443
EDTA_Plasma	ContB_EDTAPlasma	LTF2_z	age_at_visit	-0.0902988	0.0575537	443
EDTA_Plasma	ContB_EDTAPlasma	LTF1_z	cdr			443
EDTA_Plasma	ContB_EDTAPlasma	LTF2_z	cdr			443
EDTA_Plasma	ContC_EDTAPlasma	LTF1_z	LTF2_z	0.048926	0.0286712	2000
EDTA_Plasma	ContC_EDTAPlasma	LTF1_z	Comp.1	0.0429992	0.0545217	2000
EDTA_Plasma	ContC_EDTAPlasma	LTF1_z	Comp.2	0.0799952	0.000342283	2000
EDTA_Plasma	ContC_EDTAPlasma	LTF2_z	Comp.1	0.00815252	0.715582	2000
EDTA_Plasma	ContC_EDTAPlasma	LTF2_z	Comp.2	0.0460493	0.0394757	2000
EDTA_Plasma	ContC_EDTAPlasma	LTF1_z	age_at_visit	-0.0893923	6.24755e-05	2000
EDTA_Plasma	ContC_EDTAPlasma	LTF2_z	age_at_visit	-0.0398372	0.0748855	2000
EDTA_Plasma	ContC_EDTAPlasma	LTF1_z	cdr			0
EDTA_Plasma	ContC_EDTAPlasma	LTF2_z	cdr			0
EDTA_Plasma	ContD_EDTAPlasma	LTF1_z	LTF2_z	0.246454	3.36356e-08	489
EDTA_Plasma	ContD_EDTAPlasma	LTF1_z	Comp.1	0.191831	1.94683e-05	489
EDTA_Plasma	ContD_EDTAPlasma	LTF1_z	Comp.2	0.445105	3.60389e-25	489
EDTA_Plasma	ContD_EDTAPlasma	LTF2_z	Comp.1	-0.121889	0.0069644	489
EDTA_Plasma	ContD_EDTAPlasma	LTF2_z	Comp.2	0.462654	2.61981e-27	489
EDTA_Plasma	ContD_EDTAPlasma	LTF1_z	age_at_visit	-0.1183	0.00883135	489
EDTA_Plasma	ContD_EDTAPlasma	LTF2_z	age_at_visit	0.0563948	0.213177	489
EDTA_Plasma	ContD_EDTAPlasma	LTF1_z	cdr	-0.0207084	0.683115	391
EDTA_Plasma	ContD_EDTAPlasma	LTF2_z	cdr	0.137454	0.00648486	391
EDTA_Plasma	ContF_EDTAPlasma	LTF1_z	LTF2_z	0.0495833	0.00537816	3150
EDTA_Plasma	ContF_EDTAPlasma	LTF1_z	Comp.1	-0.0527695	0.00305084	3150
EDTA_Plasma	ContF_EDTAPlasma	LTF1_z	Comp.2	-0.0798398	7.24421e-06	3150
EDTA_Plasma	ContF_EDTAPlasma	LTF2_z	Comp.1	0.0355555	0.0460006	3150
EDTA_Plasma	ContF_EDTAPlasma	LTF2_z	Comp.2	0.43347	1.75232e-144	3150
EDTA_Plasma	ContF_EDTAPlasma	LTF1_z	age_at_visit	-0.0806911	5.77743e-06	3150
EDTA_Plasma	ContF_EDTAPlasma	LTF2_z	age_at_visit	-0.0411453	0.020925	3150
EDTA_Plasma	ContF_EDTAPlasma	LTF1_z	cdr	-0.0337407	0.068828	2909
EDTA_Plasma	ContF_EDTAPlasma	LTF2_z	cdr	-0.0477877	0.00994304	2909
EDTA_Plasma	ContG_EDTAPlasma	LTF1_z	LTF2_z	0.0247673	0.366775	1330
EDTA_Plasma	ContG_EDTAPlasma	LTF1_z	Comp.1	-0.24007	6.86543e-19	1330
EDTA_Plasma	ContG_EDTAPlasma	LTF1_z	Comp.2	0.0995896	0.000275212	1330
EDTA_Plasma	ContG_EDTAPlasma	LTF2_z	Comp.1	0.106495	9.97418e-05	1330
EDTA_Plasma	ContG_EDTAPlasma	LTF2_z	Comp.2	0.0387322	0.158028	1330
EDTA_Plasma	ContG_EDTAPlasma	LTF1_z	age_at_visit	-0.0357043	0.193157	1330
EDTA_Plasma	ContG_EDTAPlasma	LTF2_z	age_at_visit	-0.0847322	0.00198296	1330
EDTA_Plasma	ContG_EDTAPlasma	LTF1_z	cdr			0
EDTA_Plasma	ContG_EDTAPlasma	LTF2_z	cdr			0
EDTA_Plasma	ContH_EDTAPlasma	LTF1_z	LTF2_z			2254
EDTA_Plasma	ContH_EDTAPlasma	LTF1_z	Comp.1			2254
EDTA_Plasma	ContH_EDTAPlasma	LTF1_z	Comp.2			2254
EDTA_Plasma	ContH_EDTAPlasma	LTF2_z	Comp.1	-0.0147479	0.484036	2254
EDTA_Plasma	ContH_EDTAPlasma	LTF2_z	Comp.2	-0.0953645	5.74992e-06	2254
EDTA_Plasma	ContH_EDTAPlasma	LTF1_z	age_at_visit			2254
EDTA_Plasma	ContH_EDTAPlasma	LTF2_z	age_at_visit	-0.0148587	0.480757	2254
EDTA_Plasma	ContH_EDTAPlasma	LTF1_z	cdr			0
EDTA_Plasma	ContH_EDTAPlasma	LTF2_z	cdr			0
EDTA_Plasma	ContI_EDTAPlasma	LTF1_z	LTF2_z	0.119685	0.00514654	545
EDTA_Plasma	ContI_EDTAPlasma	LTF1_z	Comp.1	0.159036	0.00019303	545
EDTA_Plasma	ContI_EDTAPlasma	LTF1_z	Comp.2	-0.0170009	0.6921	545
EDTA_Plasma	ContI_EDTAPlasma	LTF2_z	Comp.1	0.0382657	0.372609	545
EDTA_Plasma	ContI_EDTAPlasma	LTF2_z	Comp.2	-0.0561364	0.19069	545
EDTA_Plasma	ContI_EDTAPlasma	LTF1_z	age_at_visit	-0.0694828	0.126488	485
EDTA_Plasma	ContI_EDTAPlasma	LTF2_z	age_at_visit	0.072426	0.111161	485
EDTA_Plasma	ContI_EDTAPlasma	LTF1_z	cdr	0.0175242	0.683128	545
EDTA_Plasma	ContI_EDTAPlasma	LTF2_z	cdr	0.01249	0.771109	545
EDTA_Plasma	ContJ_EDTAPlasma	LTF1_z	LTF2_z	-0.0297094	0.543249	421
EDTA_Plasma	ContJ_EDTAPlasma	LTF1_z	Comp.1	-0.213934	9.51644e-06	421
EDTA_Plasma	ContJ_EDTAPlasma	LTF1_z	Comp.2	0.0383315	0.432778	421
EDTA_Plasma	ContJ_EDTAPlasma	LTF2_z	Comp.1	0.0853758	0.0801611	421
EDTA_Plasma	ContJ_EDTAPlasma	LTF2_z	Comp.2	-0.0278838	0.568313	421
EDTA_Plasma	ContJ_EDTAPlasma	LTF1_z	age_at_visit	-0.0830451	0.0911093	415
EDTA_Plasma	ContJ_EDTAPlasma	LTF2_z	age_at_visit	0.142551	0.00361322	415
EDTA_Plasma	ContJ_EDTAPlasma	LTF1_z	cdr	-0.0142108	0.771524	420
EDTA_Plasma	ContJ_EDTAPlasma	LTF2_z	cdr	-0.0178816	0.714812	420
EDTA_Plasma	ContK_EDTAPlasma	LTF1_z	LTF2_z	0.00049073	0.992135	406
EDTA_Plasma	ContK_EDTAPlasma	LTF1_z	Comp.1	-0.3009	6.08338e-10	406
EDTA_Plasma	ContK_EDTAPlasma	LTF1_z	Comp.2	0.0186789	0.70748	406
EDTA_Plasma	ContK_EDTAPlasma	LTF2_z	Comp.1	0.133303	0.0071512	406
EDTA_Plasma	ContK_EDTAPlasma	LTF2_z	Comp.2	-0.0430439	0.387019	406
EDTA_Plasma	ContK_EDTAPlasma	LTF1_z	age_at_visit	-0.0539171	0.278437	406
EDTA_Plasma	ContK_EDTAPlasma	LTF2_z	age_at_visit	0.0747892	0.132473	406
EDTA_Plasma	ContK_EDTAPlasma	LTF1_z	cdr			1
EDTA_Plasma	ContK_EDTAPlasma	LTF2_z	cdr			1
EDTA_Plasma	ContL_EDTAPlasma	LTF1_z	LTF2_z	0.0653808	0.0300616	1101
EDTA_Plasma	ContL_EDTAPlasma	LTF1_z	Comp.1	-0.260169	1.71674e-18	1101
EDTA_Plasma	ContL_EDTAPlasma	LTF1_z	Comp.2	0.0156603	0.603712	1101
EDTA_Plasma	ContL_EDTAPlasma	LTF2_z	Comp.1	0.0286787	0.341751	1101
EDTA_Plasma	ContL_EDTAPlasma	LTF2_z	Comp.2	-0.0311159	0.302285	1101
EDTA_Plasma	ContL_EDTAPlasma	LTF1_z	age_at_visit	0.0200176	0.50719	1100
EDTA_Plasma	ContL_EDTAPlasma	LTF2_z	age_at_visit	0.0190719	0.527464	1100
EDTA_Plasma	ContL_EDTAPlasma	LTF1_z	cdr	0.0367243	0.226782	1085
EDTA_Plasma	ContL_EDTAPlasma	LTF2_z	cdr	-0.0543087	0.0737517	1085
EDTA_Plasma	ContM_EDTAPlasma	LTF1_z	LTF2_z	0.18447	0.000476811	355
EDTA_Plasma	ContM_EDTAPlasma	LTF1_z	Comp.1	0.0143249	0.787958	355
EDTA_Plasma	ContM_EDTAPlasma	LTF1_z	Comp.2	-0.370159	5.70555e-13	355
EDTA_Plasma	ContM_EDTAPlasma	LTF2_z	Comp.1	0.180261	0.000643952	355
EDTA_Plasma	ContM_EDTAPlasma	LTF2_z	Comp.2	-0.241194	4.29747e-06	355
EDTA_Plasma	ContM_EDTAPlasma	LTF1_z	age_at_visit	0.0433744	0.415223	355
EDTA_Plasma	ContM_EDTAPlasma	LTF2_z	age_at_visit	-0.0342446	0.52014	355
EDTA_Plasma	ContM_EDTAPlasma	LTF1_z	cdr			0
EDTA_Plasma	ContM_EDTAPlasma	LTF2_z	cdr			0
EDTA_Plasma	ContN_EDTAPlasma	LTF1_z	LTF2_z	0.0567996	0.110889	789
EDTA_Plasma	ContN_EDTAPlasma	LTF1_z	Comp.1	0.278309	1.68015e-15	789
EDTA_Plasma	ContN_EDTAPlasma	LTF1_z	Comp.2	-0.0487842	0.171015	789
EDTA_Plasma	ContN_EDTAPlasma	LTF2_z	Comp.1	0.100198	0.00484589	789
EDTA_Plasma	ContN_EDTAPlasma	LTF2_z	Comp.2	-0.0894824	0.0119186	789
EDTA_Plasma	ContN_EDTAPlasma	LTF1_z	age_at_visit	-0.0691006	0.052503	788
EDTA_Plasma	ContN_EDTAPlasma	LTF2_z	age_at_visit	-0.106922	0.00265327	788
EDTA_Plasma	ContN_EDTAPlasma	LTF1_z	cdr	0.00907173	0.799172	789
EDTA_Plasma	ContN_EDTAPlasma	LTF2_z	cdr	-0.00702896	0.843728	789
EDTA_Plasma	ContP_EDTAPlasma	LTF1_z	LTF2_z	0.109826	0.0122956	519
EDTA_Plasma	ContP_EDTAPlasma	LTF1_z	Comp.1	0.438537	8.34956e-26	519
EDTA_Plasma	ContP_EDTAPlasma	LTF1_z	Comp.2	0.218326	5.09945e-07	519
EDTA_Plasma	ContP_EDTAPlasma	LTF2_z	Comp.1	0.0457451	0.298258	519
EDTA_Plasma	ContP_EDTAPlasma	LTF2_z	Comp.2	-0.0141605	0.747576	519
EDTA_Plasma	ContP_EDTAPlasma	LTF1_z	age_at_visit	-0.127987	0.00349202	519
EDTA_Plasma	ContP_EDTAPlasma	LTF2_z	age_at_visit	0.0990705	0.0240022	519
EDTA_Plasma	ContP_EDTAPlasma	LTF1_z	cdr	0.00887305	0.840489	517
EDTA_Plasma	ContP_EDTAPlasma	LTF2_z	cdr	0.0589644	0.180691	517
EDTA_Plasma	ContQ_EDTAPlasma	LTF1_z	LTF2_z	0.0538018	0.0464789	1370
EDTA_Plasma	ContQ_EDTAPlasma	LTF1_z	Comp.1	-0.261768	6.69256e-23	1370
EDTA_Plasma	ContQ_EDTAPlasma	LTF1_z	Comp.2	0.073749	0.00631543	1370
EDTA_Plasma	ContQ_EDTAPlasma	LTF2_z	Comp.1	0.0446932	0.0982154	1370
EDTA_Plasma	ContQ_EDTAPlasma	LTF2_z	Comp.2	0.048588	0.0722033	1370
EDTA_Plasma	ContQ_EDTAPlasma	LTF1_z	age_at_visit	-0.0277823	0.304324	1369
EDTA_Plasma	ContQ_EDTAPlasma	LTF2_z	age_at_visit	-0.0564038	0.0369156	1369
EDTA_Plasma	ContQ_EDTAPlasma	LTF1_z	cdr	0.0116029	0.673864	1318
EDTA_Plasma	ContQ_EDTAPlasma	LTF2_z	cdr	-0.00634567	0.817968	1318
EDTA_Plasma	ContR_EDTAPlasma	LTF1_z	LTF2_z	0.00279199	0.953698	435
EDTA_Plasma	ContR_EDTAPlasma	LTF1_z	Comp.1	0.158222	0.000928389	435
EDTA_Plasma	ContR_EDTAPlasma	LTF1_z	Comp.2	0.110365	0.0213204	435
EDTA_Plasma	ContR_EDTAPlasma	LTF2_z	Comp.1	-0.437235	9.75409e-22	435
EDTA_Plasma	ContR_EDTAPlasma	LTF2_z	Comp.2	0.0496681	0.301339	435
EDTA_Plasma	ContR_EDTAPlasma	LTF1_z	age_at_visit	-0.0845158	0.0782729	435
EDTA_Plasma	ContR_EDTAPlasma	LTF2_z	age_at_visit	0.117889	0.0138826	435
EDTA_Plasma	ContR_EDTAPlasma	LTF1_z	cdr			0
EDTA_Plasma	ContR_EDTAPlasma	LTF2_z	cdr			0
EDTA_Plasma	ContS_EDTAPlasma	LTF1_z	LTF2_z	0.156104	0.0272893	200
EDTA_Plasma	ContS_EDTAPlasma	LTF1_z	Comp.1	-0.543936	8.51785e-17	200
EDTA_Plasma	ContS_EDTAPlasma	LTF1_z	Comp.2	0.287319	3.70494e-05	200
EDTA_Plasma	ContS_EDTAPlasma	LTF2_z	Comp.1	-0.0660414	0.352823	200
EDTA_Plasma	ContS_EDTAPlasma	LTF2_z	Comp.2	0.105018	0.138884	200
EDTA_Plasma	ContS_EDTAPlasma	LTF1_z	age_at_visit	0.0636425	0.370623	200
EDTA_Plasma	ContS_EDTAPlasma	LTF2_z	age_at_visit	-0.0597304	0.400812	200
EDTA_Plasma	ContS_EDTAPlasma	LTF1_z	cdr			0
EDTA_Plasma	ContS_EDTAPlasma	LTF2_z	cdr			0
EDTA_Plasma	ContT_EDTAPlasma	LTF1_z	LTF2_z	0.0918437	0.167882	227
EDTA_Plasma	ContT_EDTAPlasma	LTF1_z	Comp.1	-0.064608	0.332517	227
EDTA_Plasma	ContT_EDTAPlasma	LTF1_z	Comp.2	0.109559	0.0996557	227
EDTA_Plasma	ContT_EDTAPlasma	LTF2_z	Comp.1	0.148919	0.0248438	227
EDTA_Plasma	ContT_EDTAPlasma	LTF2_z	Comp.2	0.0183767	0.783033	227
EDTA_Plasma	ContT_EDTAPlasma	LTF1_z	age_at_visit	-0.130622	0.049855	226
EDTA_Plasma	ContT_EDTAPlasma	LTF2_z	age_at_visit	-0.0754717	0.258514	226
EDTA_Plasma	ContT_EDTAPlasma	LTF1_z	cdr	-0.0882072	0.416546	87
EDTA_Plasma	ContT_EDTAPlasma	LTF2_z	cdr	0.0494698	0.649089	87
EDTA_Plasma	ContV_EDTAPlasma	LTF1_z	LTF2_z			996
EDTA_Plasma	ContV_EDTAPlasma	LTF1_z	Comp.1			996
EDTA_Plasma	ContV_EDTAPlasma	LTF1_z	Comp.2			996
EDTA_Plasma	ContV_EDTAPlasma	LTF2_z	Comp.1	-0.351637	2.31847e-30	996
EDTA_Plasma	ContV_EDTAPlasma	LTF2_z	Comp.2	-0.109693	0.000524411	996
EDTA_Plasma	ContV_EDTAPlasma	LTF1_z	age_at_visit			994
EDTA_Plasma	ContV_EDTAPlasma	LTF2_z	age_at_visit	-0.0391687	0.21727	994
EDTA_Plasma	ContV_EDTAPlasma	LTF1_z	cdr			0
EDTA_Plasma	ContV_EDTAPlasma	LTF2_z	cdr			0
EDTA_Plasma	ContW_EDTAPlasma	LTF1_z	LTF2_z			95
EDTA_Plasma	ContW_EDTAPlasma	LTF1_z	Comp.1			95
EDTA_Plasma	ContW_EDTAPlasma	LTF1_z	Comp.2			95
EDTA_Plasma	ContW_EDTAPlasma	LTF2_z	Comp.1	-0.326414	0.00131471	95
EDTA_Plasma	ContW_EDTAPlasma	LTF2_z	Comp.2	0.0043673	0.966484	95
EDTA_Plasma	ContW_EDTAPlasma	LTF1_z	age_at_visit			95
EDTA_Plasma	ContW_EDTAPlasma	LTF2_z	age_at_visit	0.00728319	0.944155	95
EDTA_Plasma	ContW_EDTAPlasma	LTF1_z	cdr			51
EDTA_Plasma	ContW_EDTAPlasma	LTF2_z	cdr	-0.294198	0.0361239	51

## Sheet:  Supplementary Table S9
fluid	cohort	x	y	rho	p	n
Paired	ContJ	LTF1_z_CSF	LTF1_z_EDTA_Plasma			117
Paired	ContJ	LTF2_z_CSF	LTF2_z_EDTA_Plasma	0.0142667	0.878503	117
Paired	ContQ	LTF1_z_CSF	LTF1_z_EDTA_Plasma	-0.0224212	0.407314	1368
Paired	ContQ	LTF2_z_CSF	LTF2_z_EDTA_Plasma	0.0103877	0.70108	1368
Paired	ContT	LTF1_z_CSF	LTF1_z_EDTA_Plasma	-0.0237932	0.735518	204
Paired	ContT	LTF2_z_CSF	LTF2_z_EDTA_Plasma	0.0334544	0.634771	204

## Sheet:  Supplementary Table S10
fluid	LTF	sign	marker	n_present	n_datasets	threshold_n	prop_present	consensus_80
CSF	LTF1	positive	seq_11989_35	4	5	4	0.8	True
CSF	LTF1	positive	seq_6024_68	4	5	4	0.8	True
CSF	LTF2	positive	seq_3364_76	5	5	4	1	True
CSF	LTF2	positive	seq_6039_24	5	5	4	1	True
CSF	LTF2	positive	seq_10612_18	4	5	4	0.8	True
CSF	LTF2	positive	seq_4842_62	4	5	4	0.8	True
CSF	LTF2	positive	seq_6609_22	4	5	4	0.8	True
CSF	LTF2	positive	seq_9357_4	4	5	4	0.8	True
EDTAPlasma	LTF1	negative	seq_4179_57	16	20	16	0.8	True
EDTAPlasma	LTF1	positive	seq_17727_1	17	20	16	0.85	True
EDTAPlasma	LTF1	positive	seq_13085_18	16	20	16	0.8	True
EDTAPlasma	LTF1	positive	seq_22503_24	16	20	16	0.8	True
EDTAPlasma	LTF1	positive	seq_22531_44	16	20	16	0.8	True
EDTAPlasma	LTF2	negative	seq_5581_28	17	20	16	0.85	True
EDTAPlasma	LTF2	negative	seq_2211_9	16	20	16	0.8	True
EDTAPlasma	LTF2	positive	seq_2579_17	20	20	16	1	True
EDTAPlasma	LTF2	positive	seq_2836_68	20	20	16	1	True
EDTAPlasma	LTF2	positive	seq_4126_22	20	20	16	1	True
EDTAPlasma	LTF2	positive	seq_5339_49	20	20	16	1	True
EDTAPlasma	LTF2	positive	seq_13671_40	19	20	16	0.95	True
EDTAPlasma	LTF2	positive	seq_3329_14	19	20	16	0.95	True
EDTAPlasma	LTF2	positive	seq_3514_49	19	20	16	0.95	True
EDTAPlasma	LTF2	positive	seq_3636_37	19	20	16	0.95	True
EDTAPlasma	LTF2	positive	seq_13130_150	18	20	16	0.9	True
EDTAPlasma	LTF2	positive	seq_18873_8	18	20	16	0.9	True
EDTAPlasma	LTF2	positive	seq_2580_83	18	20	16	0.9	True
EDTAPlasma	LTF2	positive	seq_15576_158	17	20	16	0.85	True
EDTAPlasma	LTF2	positive	seq_19614_8	17	20	16	0.85	True
EDTAPlasma	LTF2	positive	seq_21237_24	17	20	16	0.85	True
EDTAPlasma	LTF2	positive	seq_22783_40	17	20	16	0.85	True
EDTAPlasma	LTF2	positive	seq_2681_23	17	20	16	0.85	True
EDTAPlasma	LTF2	positive	seq_4920_10	17	20	16	0.85	True
EDTAPlasma	LTF2	positive	seq_4960_72	17	20	16	0.85	True
EDTAPlasma	LTF2	positive	seq_5691_2	17	20	16	0.85	True
EDTAPlasma	LTF2	positive	seq_5741_55	17	20	16	0.85	True
EDTAPlasma	LTF2	positive	seq_5852_6	17	20	16	0.85	True
EDTAPlasma	LTF2	positive	seq_7893_19	17	20	16	0.85	True
EDTAPlasma	LTF2	positive	seq_9384_17	17	20	16	0.85	True
EDTAPlasma	LTF2	positive	seq_11205_10	16	20	16	0.8	True
EDTAPlasma	LTF2	positive	seq_12709_63	16	20	16	0.8	True
EDTAPlasma	LTF2	positive	seq_14324_52	16	20	16	0.8	True
EDTAPlasma	LTF2	positive	seq_17158_17	16	20	16	0.8	True
EDTAPlasma	LTF2	positive	seq_17364_8	16	20	16	0.8	True
EDTAPlasma	LTF2	positive	seq_17766_5	16	20	16	0.8	True
EDTAPlasma	LTF2	positive	seq_19261_12	16	20	16	0.8	True
EDTAPlasma	LTF2	positive	seq_20076_7	16	20	16	0.8	True
EDTAPlasma	LTF2	positive	seq_21008_113	16	20	16	0.8	True
EDTAPlasma	LTF2	positive	seq_23620_16	16	20	16	0.8	True
EDTAPlasma	LTF2	positive	seq_2987_37	16	20	16	0.8	True
EDTAPlasma	LTF2	positive	seq_4414_69	16	20	16	0.8	True
EDTAPlasma	LTF2	positive	seq_4831_4	16	20	16	0.8	True
EDTAPlasma	LTF2	positive	seq_5351_52	16	20	16	0.8	True
EDTAPlasma	LTF2	positive	seq_6267_51	16	20	16	0.8	True
EDTAPlasma	LTF2	positive	seq_9172_69	16	20	16	0.8	True
EDTAPlasma	LTF2	positive	seq_9742_59	16	20	16	0.8	True

[truncated: 3 more sheets:  Supplementary Table S11,  Supplementary Table S12,  Supplementary Table S13]
